# Supplementary material for: The regioselectivity of the interaction between dextromethorphan and CYP2D6
Source: Royal Society of Chemistry journal article supplement (doi:10.1039/d1cp03933d), 2021-12-16
Supplement: d1cp03933d1.pdf [file d1cp03933d1.pdf]

## Supporting Information

### The regioselectivity of the interaction between dextromethorphan and CYP2D6

*Min-Zhang Sun,<sup>a</sup> Qing-Chuan Zheng<sup>\*a,b</sup>*

<sup>a</sup>Laboratory Institute of Theoretical Chemistry, College of Chemistry, Jilin University,

2 Liutiao Road, Changchun 130023, People's Republic of China.

<sup>b</sup>Key Laboratory for Molecular Enzymology and Engineering of the Ministry of

Education, Jilin University, Changchun 130023, People's Republic of China.

**This supporting information contains nine supplementary figures (Figure S1-S10)**

**and one supplementary table (Table S1).**

## Supplementary figures

### Model 3

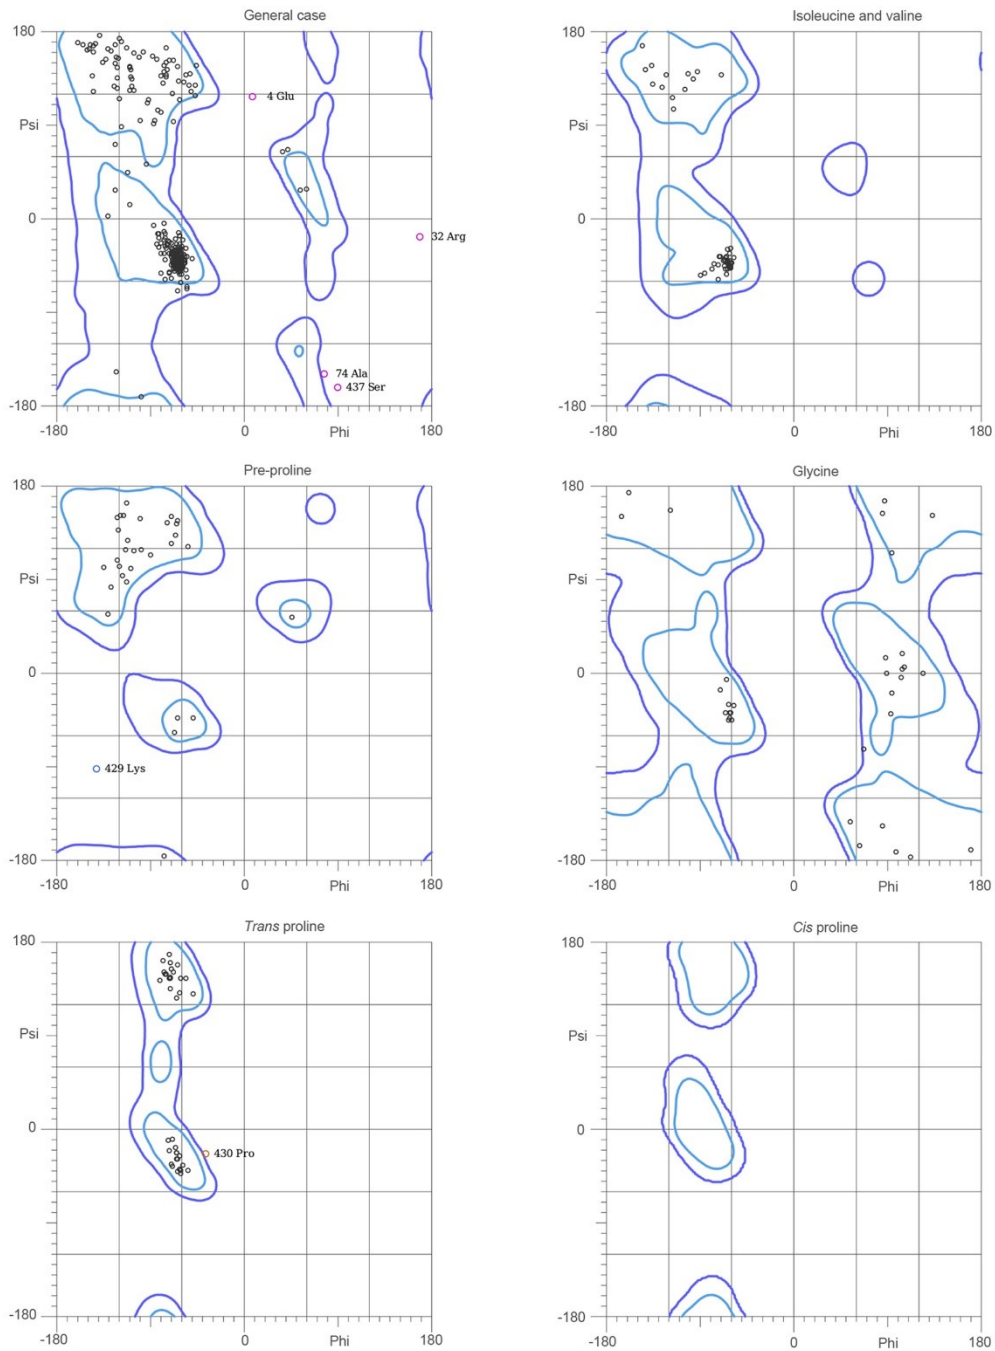

**Figure S1.** The ramachandran analysis results of model 3.

96.2% (476/495) of all residues were in favored (98%) regions.

98.8% (489/495) of all residues were in allowed (>99.8%) regions.

## 4WNT

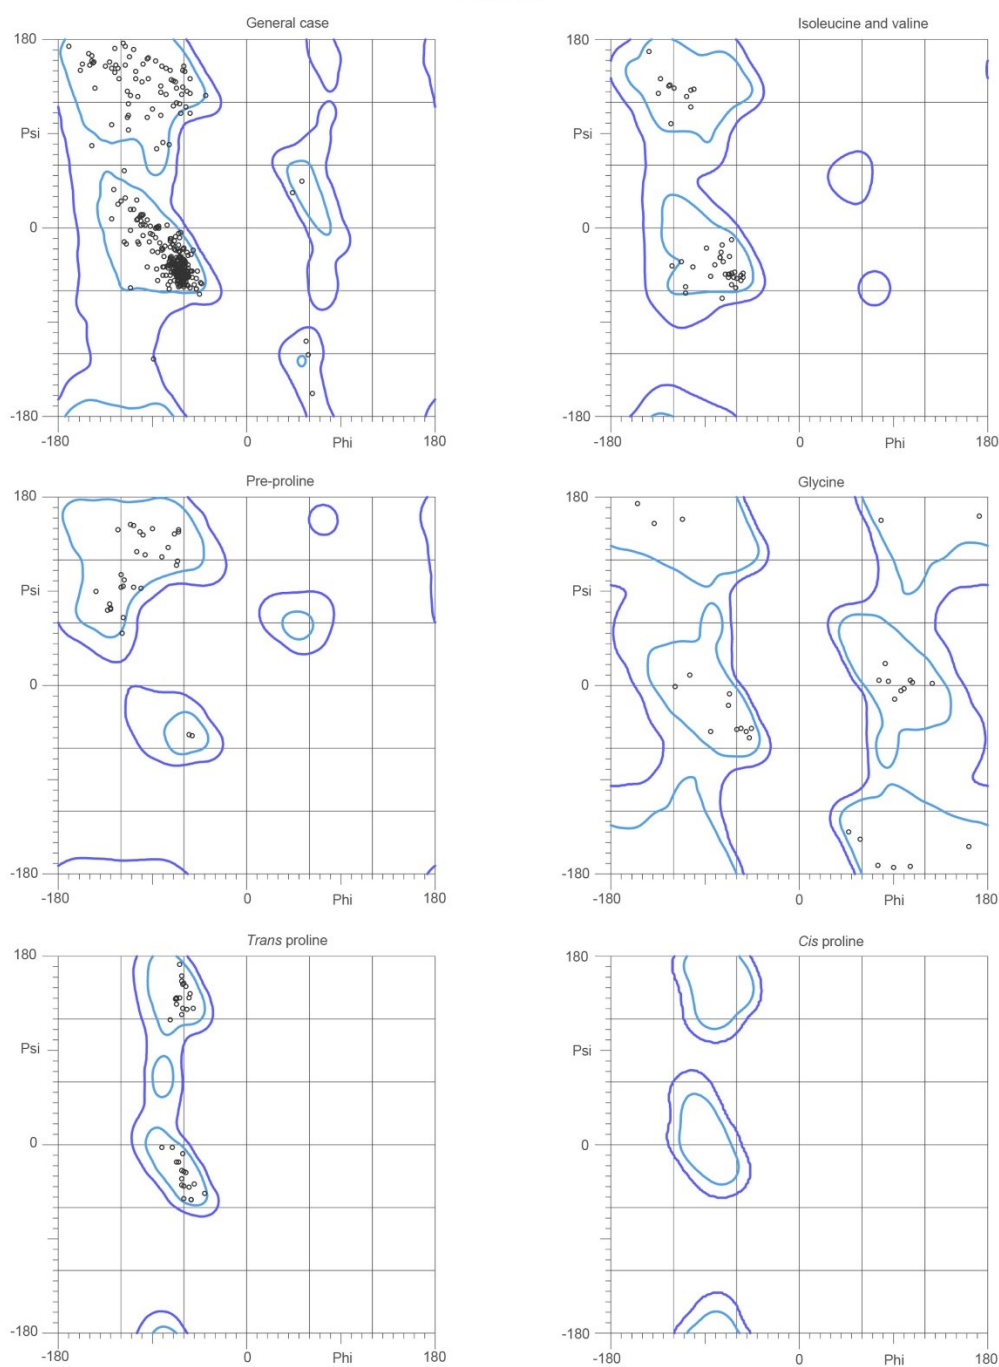

**Figure S2.** The ramachandran analysis results of crystal structure 4WNT.

96.9% (439/453) of all residues were in favored (98%) regions.

100% (453/453) of all residues were in allowed (>99.8%) regions.

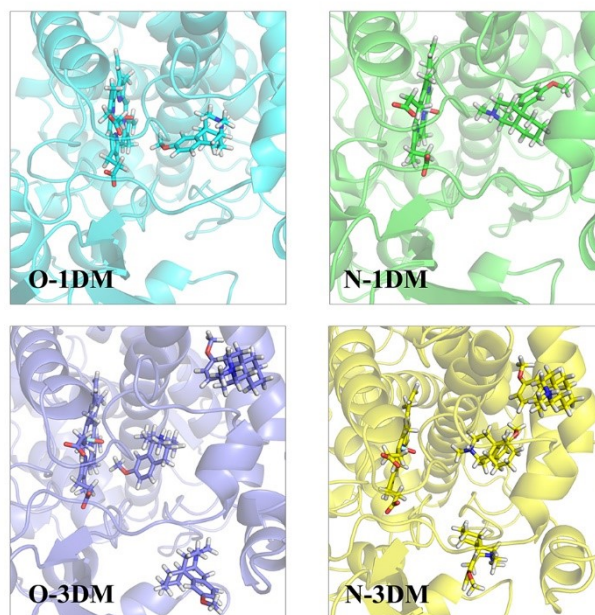

**Figure S3.** The four systems constructed in the present study. Cpd I and DM molecules are shown in stick.

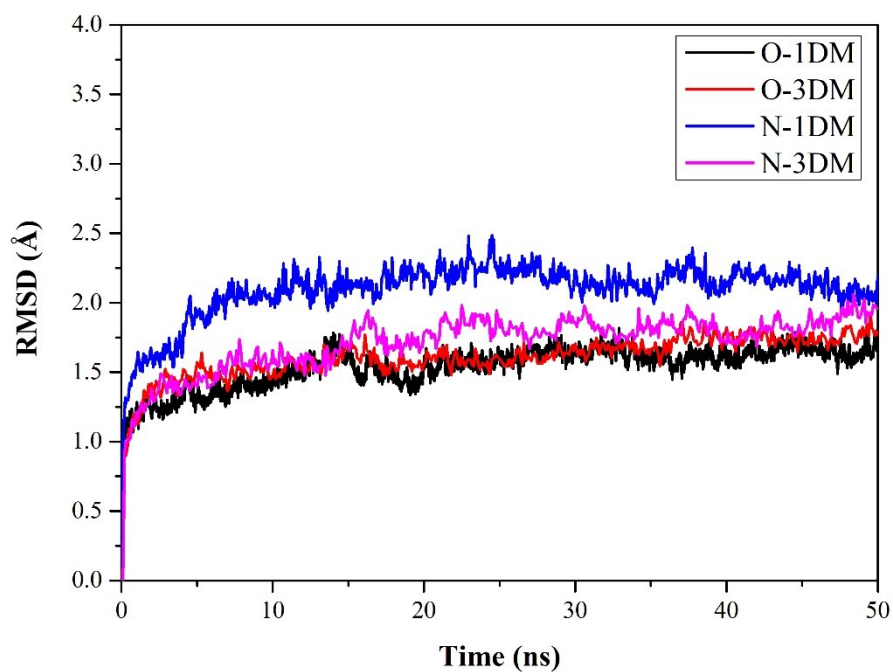

**Figure S4.** The RMSD results of 50ns simulations for the four systems in the present study.

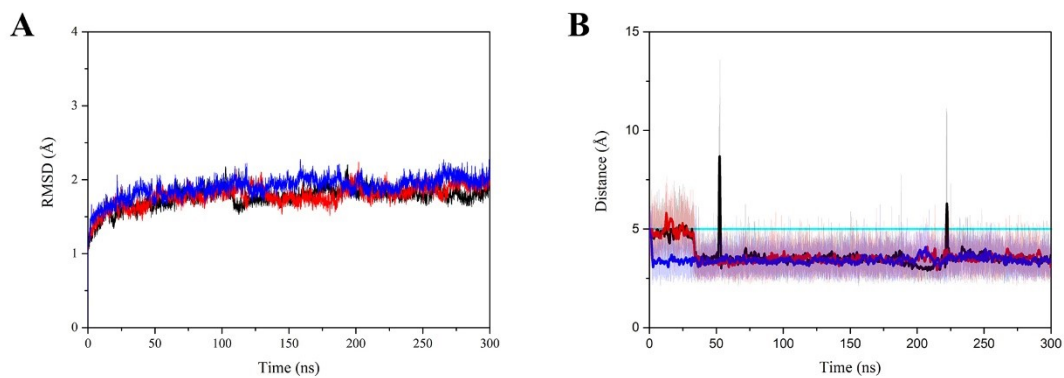

**Figure S5.** RMSD and distance measurement results of the **O-1DM** system. **A** shows the RMSD of the three parallel trajectories, which are colored in blue, red and black respectively. **B** shows the distance between the reactive site of DM (the  $-\text{OCH}_3$  group) and the oxygen atom of Cpd I.

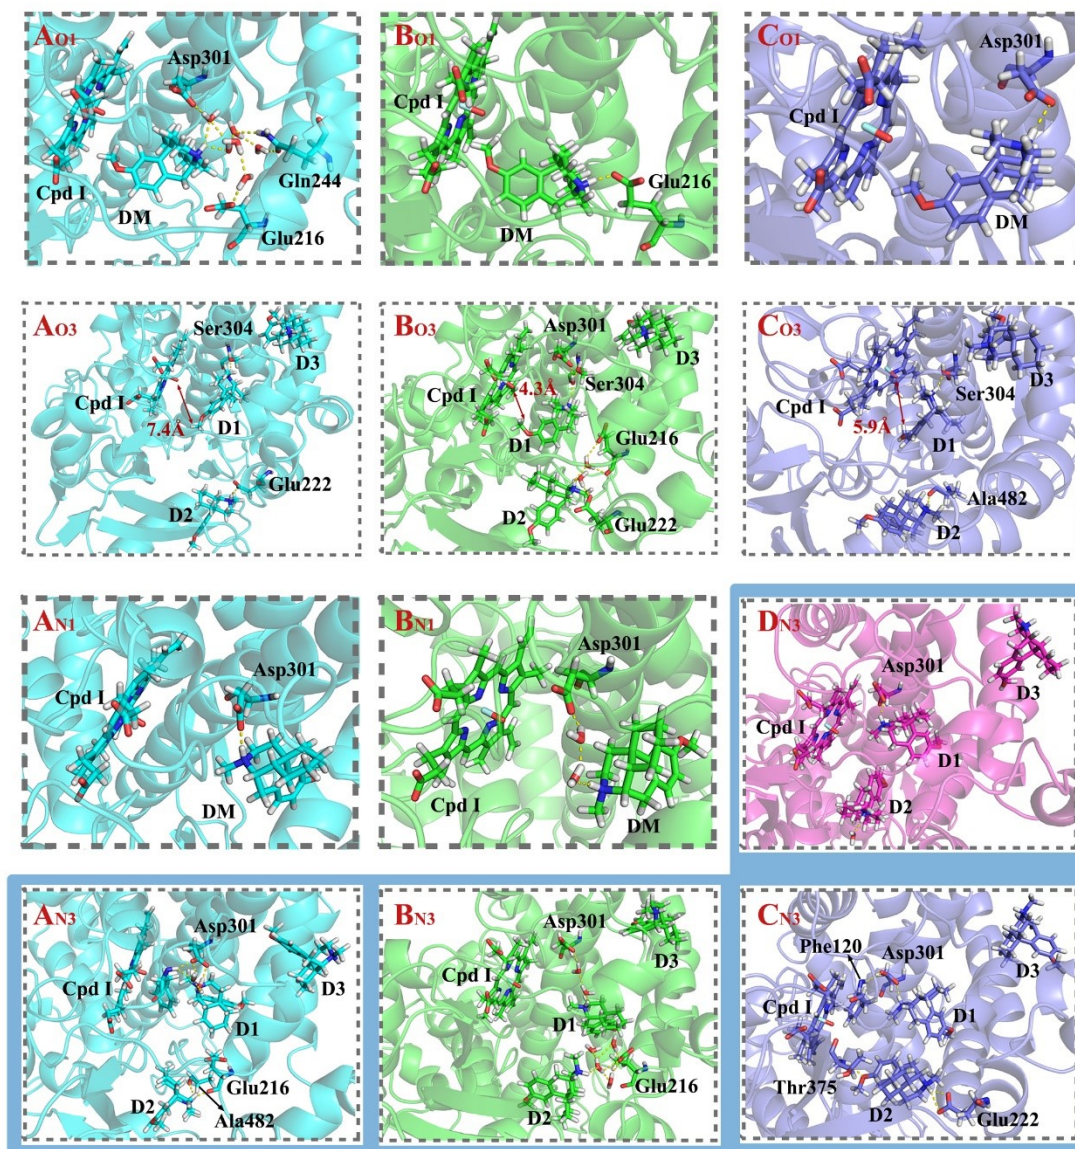

**Figure S6.** Details of the binding mode of the substrate and its interactions with the important residues. Different binding modes have been labeled in red at the top-left corner, and the four states of the **N-3DM** system are painted in blue background for the convenience of viewing.

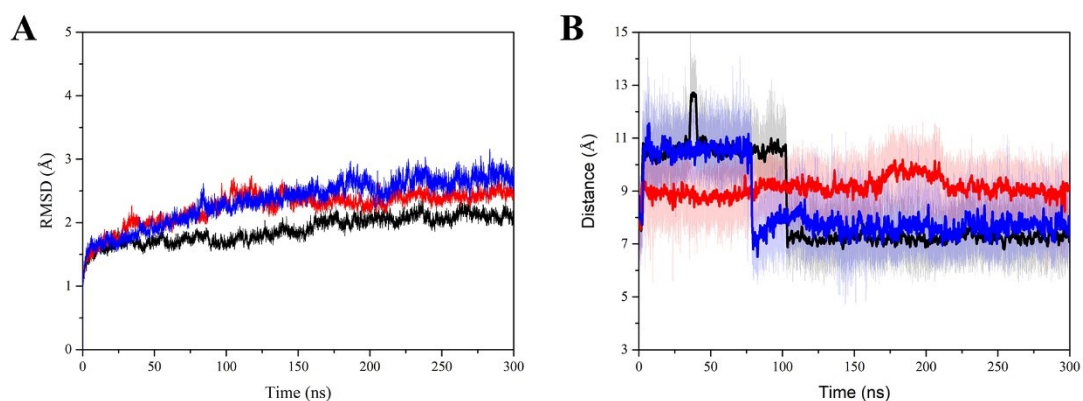

**Figure S7.** RMSD and distance measurement results of the **O-3DM** system. **A** shows the RMSD of the three parallel trajectories, which are colored in blue, red and black respectively. **B** shows the distance between the reactive site of D1 (the  $-\text{OCH}_3$  group) and the oxygen atom of Cpd I.

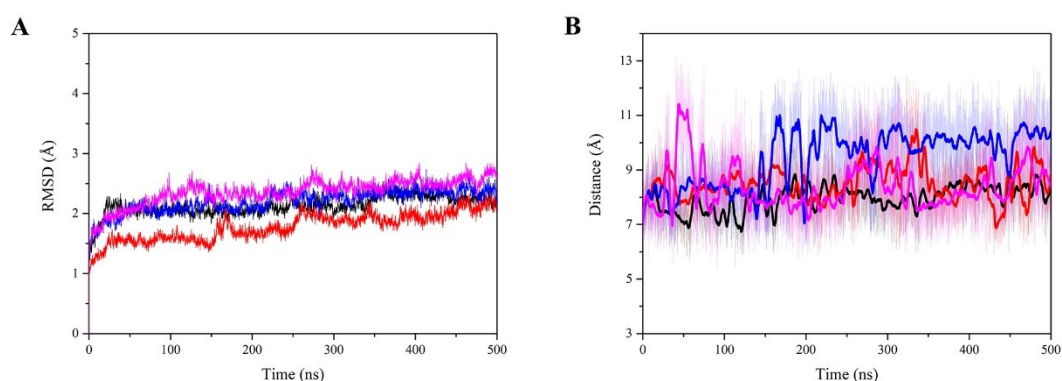

**Figure S8.** RMSD and distance measurement results of the **N-1DM** system. **A** shows the RMSD of the four parallel trajectories, which are colored in blue, red, purple and black respectively. **B** shows the distance between the reactive site of DM (the  $-\text{NCH}_3$  group) and the oxygen atom of Cpd I.

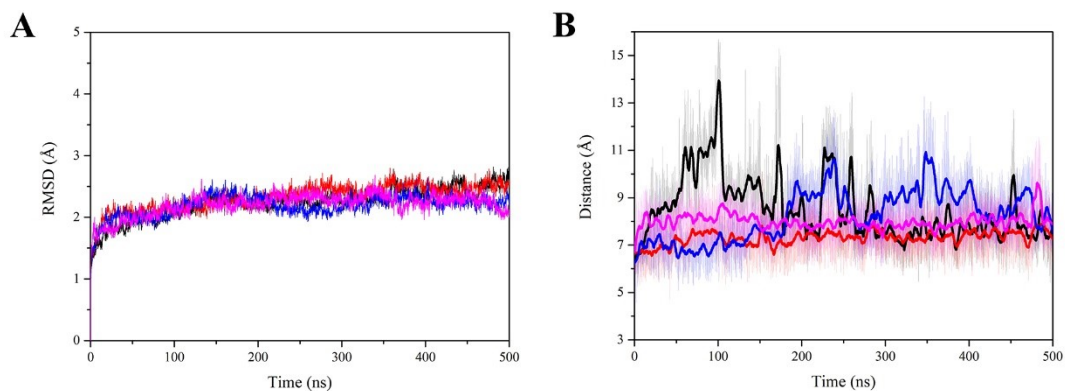

**Figure S9.** RMSD and distance measurement results of the **N-3DM** system. **A** shows the RMSD of the four parallel trajectories, which are colored in blue, red, purple and black respectively. **B** shows the distance between the reactive site of D1 (the  $\text{-NCH}_3$  group) and the oxygen atom of Cpd I.

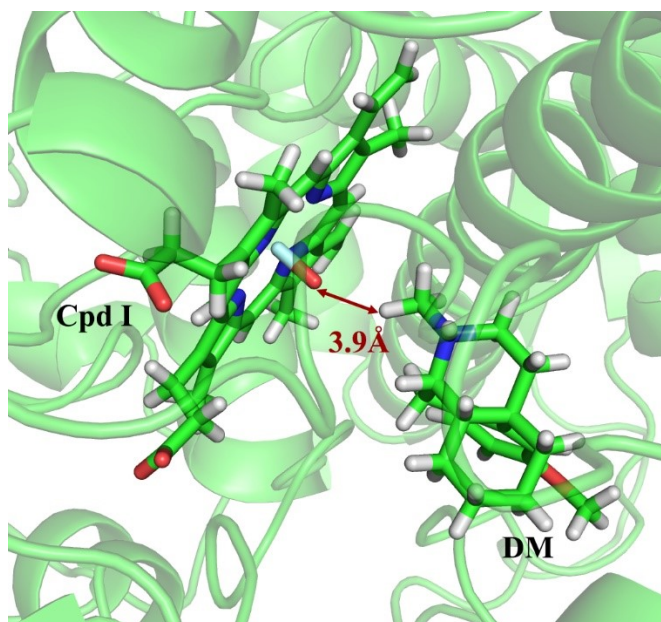

**Figure S10.** The structure of the **N-3DM** system with the reactive distance smaller than  $5\text{\AA}$



## One supplementary table

**Table S1** The timescale for each system in the present study

| <b>Systems</b> | <b>Timescale</b> | <b>Replications</b> | <b>Total timescale</b> |
|----------------|------------------|---------------------|------------------------|
| <b>O-1DM</b>   | 300 ns           | 3                   | 900 ns                 |
| <b>O-3DM</b>   | 300 ns           | 3                   | 900 ns                 |
| <b>N-1DM</b>   | 500 ns           | 4                   | 2000 ns                |
| <b>N-3DM</b>   | 500 ns           | 4                   | 2000 ns                |
